# Supplementary material
Source: publisher figshare collection journal article supplement (https://tandf.figshare.com/ndownloader/files/17449160)
Supplement: Supplementary file 1 [file 17449160]

**Supplementary table**

Primers of ABA synthesis and decomposition, GA synthesis key genes for qPCR

| **Gene ID** | **F1 (5'**-**3')** | **F2 (5'**-**3')** |
| --- | --- | --- |
| *TUBULIN*  *NCED3* | GGTTGAGTGAGCAGTTCAC  CGGAACACCATTTGACTG | GATAACCAGCCACACCTTAGC  CACGAAGCGACAATGATG |
| *NCED1* | CGAAGGTATCTGGGTTTG | CCACCATACTTCTCATCC |
| *CYP707A1*  *CYP707A2*  *GA20OX2*  *GA3OX4* | TGAGATCATCACGCAAGG  GGTGGATAAGTGGGTTTG  GGAAGAACGCCAGTGATT  GATACTCCGTCCAACTAACC | TCCCAATGTCTTCTTCGC  CAGAAGAGGTACGGTGAT  GGCTCTATCCAACGGTAAG  GCCTGTCGATGTGAAGAT |
